# Supplementary material for: The Budyko functions under non-steady state conditions: newapproach and comparison with previous formulations
Source: Copernicus journal article supplement (doi:10.5194/hess-2016-379), 2016-07-26
Supplement: Supplementary file [file hess-2016-379-AC1-supplement.pdf]

## Responses to reviewers

We are very grateful to both reviewers Dr Gudmundsson and Dr Jaramillo for their constructive comments of the manuscript. We totally agree with all their recommendations.

### Referee #1: L. Gudmundsson

*The authors present an interesting study in which they propose an approach to extend Budyko functions to non-steady state conditions. The approach is based on a careful evaluation of the feasible limits of the Budyko-Turc space, which are subsequently adjusted for the case where additional water is available for evapotranspiration. This yields a general framework into which common Budyko functions can be inserted. Finally, the authors apply the proposed framework to popular Budyko functions and compare the results to previous studies.*

*Interestingly, the authors show that if their approach is applied to Fu's equation (Fu,1981), their approach yields an equation that is mathematically identical to a recent extension (Greve et al, 2016), after minor rearrangements. This finding increases the credibility of the results as the presented study and Greve et al (2016) have derived the same results on the basis of two independent approaches. Nevertheless, the presented work is clearly a new development as it (1) offers a more general approach that is applicable to a wide range of Budyko functions and (2) provides more explicit insights into the role of water storage (S) to the  $y_0$  parameter identified by Greve et al (2016).*

*Overall the paper is clearly structured and I find the graphical derivation of the proposed extension very convincing. Consequently, I do recommend the publication of the proposed work after some specific comments have been accounted for.*

Thank you!

#### SPECIFIC COMMENTS:

##### 1. \*\* \*\* Specific Comment 1: \*\* \*\*

*Although the paper is well structured I had the impression that it would benefit from some linguistic fine tuning and that some sections could be presented more clearly.*

Ok. Additional comments will be made to clarify some sections, and linguistic refinement to improve the text.

##### 2. \*\* \*\* Specific Comment 2: \*\* \*\*

*The authors mention that the equation that is derived using their approach and Fu's equation, yields an equation that is "similar" to the equation derived by Greve et al (2016). In fact, the two equations are IDENTICAL after some minor re-arrangements, which is also shown by the authors. I therefore would like to urge the authors to clarify this issue in the revised manuscript. (As noted above, the authors work is nevertheless very valuable as it provides an*

independent validation of the previously derived function and allows for an explicit assessment of the amount of storage water that is available for evapotranspiration).

Ok. A discussion comparing the ML and the Greve et al's approaches will be added in order to clarify how two totally different methods based on very different hypotheses give exactly the same result and equation. We will discuss the relationship between  $S^*$  of the ML formulation and  $y_0$  of Greve et al.

### 3. \*\* \*\* Specific Comment 3: \*\* \*\*

*Page 4, lines 8ff: This section contains the actual derivation of the authors approach to incorporate storage water into Budyko functions. Unfortunately, I had to read this section several times before I could understand the logic underlying their approach. Therefore, I would like to encourage the authors to expand this section, and explain the important steps in more detail. More specifically: (1) I was wondering why the authors did search for the equation shown in line 12. (2) It took me a while to figure out how the values of beta, alpha and gamma were chosen (one or two sentences explaining the logic behind this would be helpful).*

Ok. This paragraph will be rewritten in order to clarify the choice of the function used to transform the limits under steady state conditions (Figures 2a, b) to those under non-steady state conditions (Figures 2c, d), and to better explain the calculation of the parameters alpha, beta and gamma.

## **Referee#2: F. Jaramillo**

*The authors present a formulation for the use of the Budyko framework for non-steady conditions, i.e., with change in water storage within the basin. I find the manuscript an interesting approach that starts from definitions of water availability and energy demand in the "Turc space", later transposed to the "Budyko space", to end up with a formulation expressing the evaporative ratio in terms of change in storage and aridity index. Advantages: Their non-steady conditions formulation in its final way (Eq. 9) is simple, and can be obtained easily from any other steady-state formulation. It also confirms the robustness of Greve et al. (2016) and finds some important differences with those of Chen et al. (2013) and Du et al. (2013). I also appreciate the literature review on the theory behind the use of the Budyko framework for non-steady conditions.*

Thank you!

*Some suggestions to improve the manuscript are:*

*1. I find that the start from the "Turc space" and constant change to "Budyko space" gets confusing sometimes. Can't their formulation start directly from the much more commonly used "Budyko space"?*

We understand the questioning of the reviewer. Under steady-state conditions, the upper and lower limits are similar in both Turc and Budyko spaces. Moreover, both Turc-Mezentsev and Fu-Zhang functions, which are obtained from the resolution of a Pfaffian differential equation, have the following remarkable simple property:  $B_1 = B_2$ . However, this is not the

case for non-steady state conditions because the upper and lower limits differ when using the Turc or the Budyko space. The upper and lower limits and the transformation from steady to non-steady state conditions are easier to grasp in the Turc space. It is the reason why we prefer keeping both representations Turc and Budyko.

2. I find the term  $S^*$  somehow difficult to grasp. First, why not just use  $\Delta S$ , for better clarity, instead of  $S = -\Delta S$ ? Second, why not divide  $\Delta S$  (water) by  $P$  (water) instead of by  $EP$  (energy)? This would make much more sense, expressing the change in storage relative to  $P$ , something like  $S^* = \Delta S/P$ . I think in this way it would be so straightforward to use by anyone...

We prefer keeping  $S = -\Delta S$  for two reasons: first to deal with a positive value when additional water is available for evapotranspiration and a negative value when water is withdrawn from precipitation; second to have a positive value which can be easily compared to the positive parameter  $y_0$  of Greve et al.'s equation, one of the main results of the paper.

Thank you for this interesting suggestion to use  $\Delta S/P$ . In fact, the adimensionalization of  $S$  can either be made as  $S^* = S/E_p$  or  $S^{**} = S/P = (S/E_p)(E_p/P) = S^* \Phi$  with  $\Phi = E_p/P$ . All equations can be either written using  $S^*$  or  $S^{**}$ , however the limits and the shape of the curves differ. The calculation can be easily made with  $S^{**}$  and we will add the results in the revised version.

3. The  $S$  limit definition of Line 12 page 3:  $0 < S < E_p$ , can the authors then explain in more detail this  $S$  limit definition (Line 12 page 3) for clarity? This because as it is,  $S$  is always positive, implying that  $\Delta S$  is always negative. So what about water storage in reservoirs ( $\Delta S > 0$ ), could the ML formulation for non-steady conditions also be used to represent this condition? Or if there is a typo there, could the ML formulation be applied conversely,  $\Delta S < 0$ , e.g. groundwater depletion for irrigation? See definition for both cases in "Local flow regulation and irrigation raise global human water consumption and footprint", 2015, Supplementary Information.

Thank you again for this interesting suggestion. The methodology will be extended for negative values of  $S$ . We had already made the calculation and will add the results in the revised version. In the Turc and the Budyko spaces, the upper limits are similar for both cases  $S > 0$  and  $S < 0$ , however the lower limits differ, and consequently the derivation of some equations will differ. The suggested reference will be cited.

4. Upgrade the justification of their study (Line 20-21, page 2), something like a very-well needed validation, integration and comparison of non-steady formulations in Budyko space; that is what their work is from my point of view?

Ok. A more detailed justification of the study will be added.

5. Why would I prefer the ML formulation, please expand? I think the fact that no additional parameters other than  $PET$ ,  $P$  and  $\Delta S$  to obtain  $ET/P$  for non-steady conditions is an important advantage.

Ok. A more detailed explanation of the domain of application of the ML formulation will be added and discussed.

6. *One of the main conclusions is 25-28 page 8: Just by reading the corresponding discussion (Line 6-14, page 8) it is somehow difficult to understand. Can the authors use an additional figure comparing for the same storage conditions ALL the four formulations, Greve et al., ML, Chen et al. and Du et al., either in the normal Budyko  $[E_p/P, E/P]$  or in the modified space  $[E_p/(P+dS), E/(P+dS)]$ . This synthesis would be very helpful for the reader and potential users of the ML formulation!*

Ok. We will add an additional figure comparing the four formulations, Greve et al., ML, Chen et al. and Du et al. in the modified space  $[E_p/(P+dS), E/(P+dS)]$  for both cases  $S > 0$  and  $S < 0$ .
